# Supplementary material
Source: ML conference proceedings conference paper supplement (https://proceedings.mlr.press/v80/olofsson18a.html)
Supplement: Supplementary file [file olofsson18a-supp.pdf]

## A. Table of Notation

Table A. Summary of notation.

| Symbol                             | Description                                                                                         |
|------------------------------------|-----------------------------------------------------------------------------------------------------|
| $f_i$                              | Function associated with model $\mathcal{M}_i$                                                      |
| $f_{i,(e)}$                        | Dimension $e$ of function $f_i$ ; $e = 1, \dots, E$                                                 |
| $\mathbf{x}$                       | Design variable, $\mathbf{x} \in \mathcal{X} \subset \mathbb{R}^d$                                  |
| $\boldsymbol{\theta}_i$            | Parameters of model $\mathcal{M}_i$ , $\boldsymbol{\theta}_i \in \Theta_i \subset \mathbb{R}^{D_i}$ |
| $M$                                | No. of models $\mathcal{M}_i$ ; $i = 1, \dots, M$                                                   |
| $E$                                | No. of target dimensions; $f_i : \mathbb{R}^{d+D_i} \rightarrow \mathbb{R}^E$                       |
| $\boldsymbol{\Sigma}_{\text{exp}}$ | Measurement noise covariance                                                                        |
| $\mathcal{D}_{\text{exp}}$         | The set of experimental observations                                                                |
| $\mathcal{D}_{\text{sim},i}$       | The set of simulated data for model $\mathcal{M}_i$                                                 |

## B. Design Criteria

We let  $\Delta_{ij} = f_i(\mathbf{x}, \hat{\boldsymbol{\theta}}_i) - f_j(\mathbf{x}, \hat{\boldsymbol{\theta}}_j)$  and the covariance  $\boldsymbol{\Sigma}_i = \boldsymbol{\Sigma}_{\text{exp}} + \check{\boldsymbol{\Sigma}}_i(\mathbf{x})$ , where  $\check{\boldsymbol{\Sigma}}_i(\mathbf{x})$  is the covariance of model  $\mathcal{M}_i$ 's marginal predictive distribution due to model parameter uncertainty.

For a single-response system, [Box & Hill \(1967\)](#) derive the design criterion  $D_{\text{BH}}$ , later generalised to a multi-response form by [Prasad & Someswara Rao \(1977\)](#)

$$D_{\text{BH}}(\mathbf{x}) = \sum_{i,j=1}^M \frac{\pi_{N,i} \pi_{N,j}}{2} \left\{ \Delta_{ij}^\top (\boldsymbol{\Sigma}_i^{-1} + \boldsymbol{\Sigma}_j^{-1}) \Delta_{ij} + \text{tr} (\boldsymbol{\Sigma}_i \boldsymbol{\Sigma}_j^{-1} + \boldsymbol{\Sigma}_j \boldsymbol{\Sigma}_i^{-1} - 2\mathbf{I}) \right\}.$$

[Buzzi-Ferraris et al. \(1990\)](#) derive the design criterion  $D_{\text{BF}}$

$$D_{\text{BF}}(\mathbf{x}) = \max_{1 \leq i,j \leq M} \left\{ \Delta_{ij}^\top (\boldsymbol{\Sigma}_i + \boldsymbol{\Sigma}_j)^{-1} \Delta_{ij} + \text{tr} (2\boldsymbol{\Sigma}_{\text{exp}} (\boldsymbol{\Sigma}_i + \boldsymbol{\Sigma}_j)^{-1}) \right\}.$$

designed such that if  $\max_{\mathbf{x}} D_{\text{BF}}(\mathbf{x}) < E$ , the largest difference between model predictions is too small compared to the measurement noise variance to carry out model discrimination, and design of experiments terminates.

[Michalik et al. \(2010\)](#) proceed from the Akaike information criterion (AIC) as the model discrimination criterion to derive a design criterion  $D_{\text{AW}}$  from the Akaike weights

$$w_i(\mathbf{x}) = \frac{1}{\sum_{j=1}^M \exp \left( \frac{-1}{2} \Delta_{ij}^\top \boldsymbol{\Sigma}_i^{-1} \Delta_{ij} + D_i - D_j \right)},$$

yielding  $D_{\text{AW}} = \sum_i w_i p(\mathcal{M}_i)$ , where  $p(\mathcal{M}_i)$  is the prior probability of model  $\mathcal{M}_i$ .

## C. Case study from Vanlier et al. (2014)

There are nine chemical components with concentrations  $C_i$ ,  $i = 1, \dots, 9$ . The system of ordinary differential equations has the form

$$\begin{aligned} dC_1/dt &= -g_1 + g_2, \\ dC_2/dt &= g_1 - g_2, \\ dC_3/dt &= -g_3 + g_4, \\ dC_4/dt &= g_3 - g_4 - g_5 + g_6, \\ dC_5/dt &= -g_9 + g_{10}, \\ dC_6/dt &= -g_5 + g_6 + g_9 - g_{10}, \\ dC_7/dt &= g_5 - g_6, \\ dC_8/dt &= -g_7 + g_8, \\ dC_9/dt &= g_7 - g_8, \end{aligned}$$

i.e. the stoichiometry is the same for all models  $\mathcal{M}_i$ . But some of the fluxes  $g_1, \dots, g_{10}$  differ for the different models. For all models  $\mathcal{M}_i$  the following fluxes are identical:

$$\begin{aligned} g_2 &= \theta_{i,2} C_2, & g_7 &= \theta_{i,7} C_8, \\ g_4 &= \theta_{i,4} C_4, & g_8 &= \theta_{i,8} C_9, \\ g_5 &= \theta_{i,5} C_4 C_6, & g_9 &= \theta_{i,10} C_5, \\ g_6 &= \theta_{i,6} C_7, & g_{10} &= \theta_{i,4} C_6. \end{aligned}$$

For flux  $g_1$  the models differ in the following way:

$$\begin{aligned} \mathcal{M}_i : g_1 &= \theta_{i,1} C_1, \quad i \in \{1, 3, 4\} \\ \mathcal{M}_2 : g_1 &= \frac{\theta_{2,1} C_1}{\theta_{2,9} + C_7}. \end{aligned}$$

For flux  $g_3$  the models differ in the following way:

$$\begin{aligned} \mathcal{M}_1 : g_3 &= \frac{\theta_{1,3} C_2 C_3}{\theta_{1,9} + C_7}, & \mathcal{M}_3 : g_3 &= \frac{\theta_{3,3} C_2 C_3}{\theta_{3,9} + C_9}, \\ \mathcal{M}_2 : g_3 &= \theta_{2,3} C_2 C_3, & \mathcal{M}_4 : g_3 &= \frac{\theta_{4,3} C_2 C_3}{\theta_{4,9} + C_8}. \end{aligned}$$

We assume that the only measured states are the concentrations  $C_4$  and  $C_9$ , because these are the states from which [Vanlier et al. \(2014\)](#) collect their initial data. Similarly, we use the initial concentrations  $C_4(t=0)$  and  $C_9(t=0)$  as two of our design variables, the third design variable being the time point  $t$  at which to measure the concentrations.

[Vanlier et al. \(2014\)](#) look at times points in the range  $t \in [0, 20]$ , which we also adopt. We assume the initial concentrations  $C_4(t=0), C_9(t=0) \in [0, 1]$  and fix all other initial concentrations to

$$\begin{aligned} C_1(t=0) &= C_3(t=0) = C_5(t=0) = C_8(t=0) = 1, \\ C_2(t=0) &= C_6(t=0) = C_7(t=0) = 0.1. \end{aligned}$$

We assume the model parameter space  $\boldsymbol{\theta} \in [0, 1]^{10}$ . Simulations show that sampling from this parameter space gives a wide range of model realisations.

With reference to models  $\mathcal{M}_1$  and  $\mathcal{M}_2$  being similar, we see that the only difference between them is that the term  $\theta_{i,9} + C_7$  divides  $g_1$  and  $g_3$  for  $\mathcal{M}_1$  and  $\mathcal{M}_2$ , respectively. If  $C_7$  is small compared to  $\theta_{i,9}$ , then the models are nearly identical.
